# Supplementary material for: Efficiency assessment of single unit monomer insertion reactions for monomer sequence control: kinetic simulations and experimental observations
Source: Royal Society of Chemistry journal article supplement (doi:10.1039/c5py00485c), 2015-01-01
Supplement: c5py00485c1.pdf [file c5py00485c1.pdf]

## Supporting Information

# Efficiency Assessment on Single Unit Monomer Insertion Reactions for Monomer Sequence Control: Kinetic Simulations and Experimental Observations

*Joris J. Haven,<sup>a</sup> Joke Vandenberg,<sup>a</sup> Rafael Kurita,<sup>a,b</sup> Jonas Gruber,<sup>b</sup> Tanja Junkers<sup>a,c\*</sup>*

<sup>a</sup>Polymer Reaction Design Group, Institute for Materials Research (imo-imomec), Hasselt University, Campus Diepenbeek, Building D, B-3590 Diepenbeek, Belgium

<sup>b</sup> Escola Polytécnica da Universidade de São Paulo, Avenida Professor Luciano Gualberto, Travessa 3, nº 380, Butantã - São Paulo, 05508-010, Brazil

<sup>c</sup>IMEC division IMOMEK, Wetenschapspark 1, B-3590 Diepenbeek, Belgium

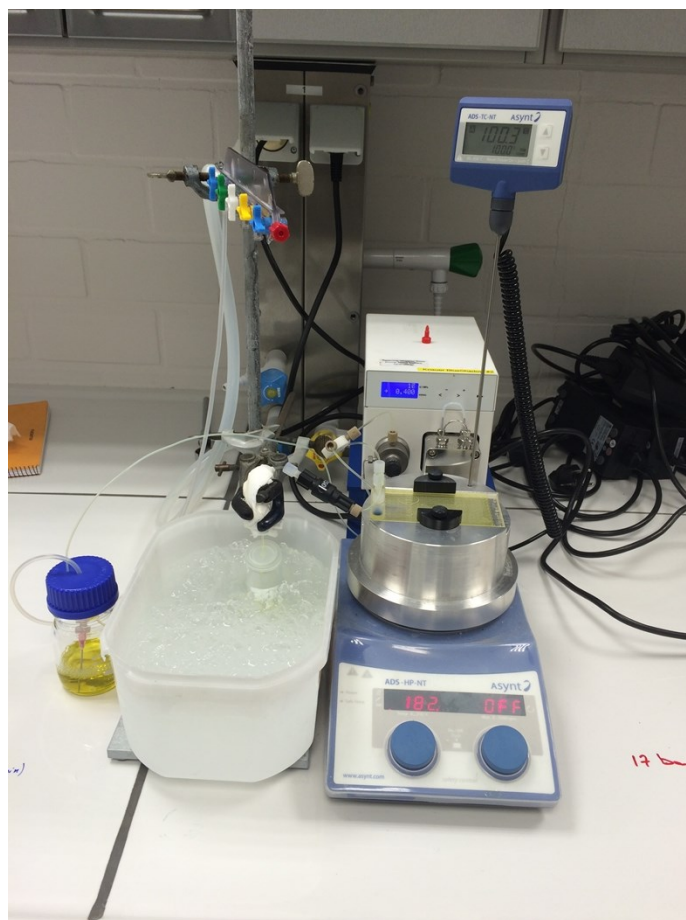

**Figure S1.** Image of the mesoreactor setup utilized for the upscaled SUMI synthesis.

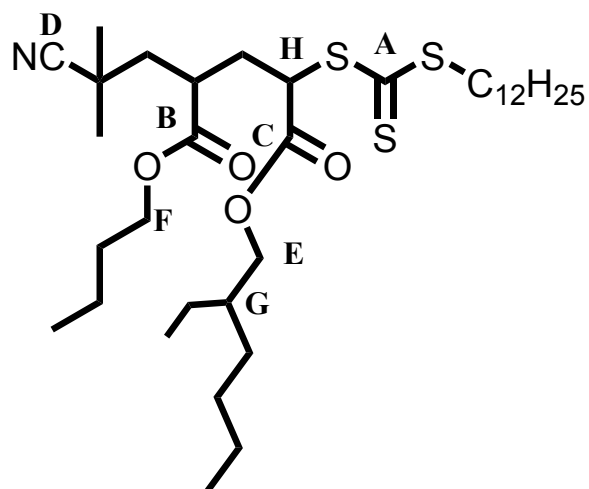

**Figure S2.**  $^{13}\text{C}$ NMR peak assignments of the SUMI-2AB product (see Figure S3, S4 and S5).

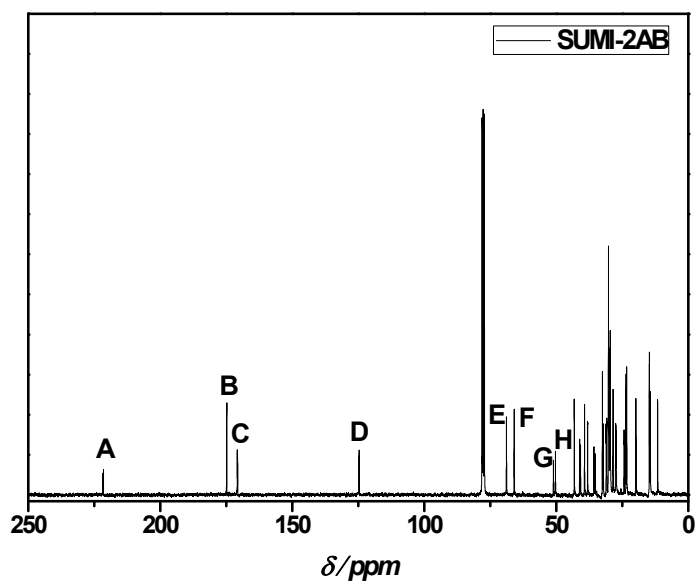

**Figure S3.**  $^{13}\text{C}$  NMR spectrum of SUMI-2AB (*n*BA-EHA oligo-RAFT agent).

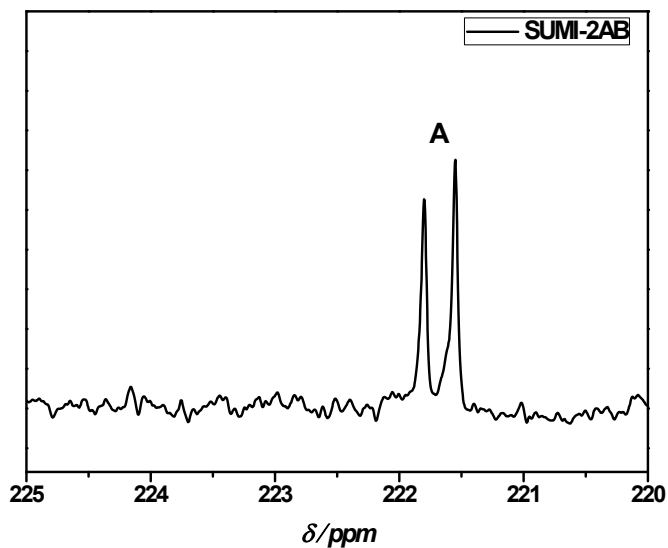

**Figure S4.** Zoom into <sup>13</sup>C NMR spectrum of **SUMI-2AB** (*n*BA-EHA oligo-RAFT agent), The two peaks can be assigned to different diastereomers.

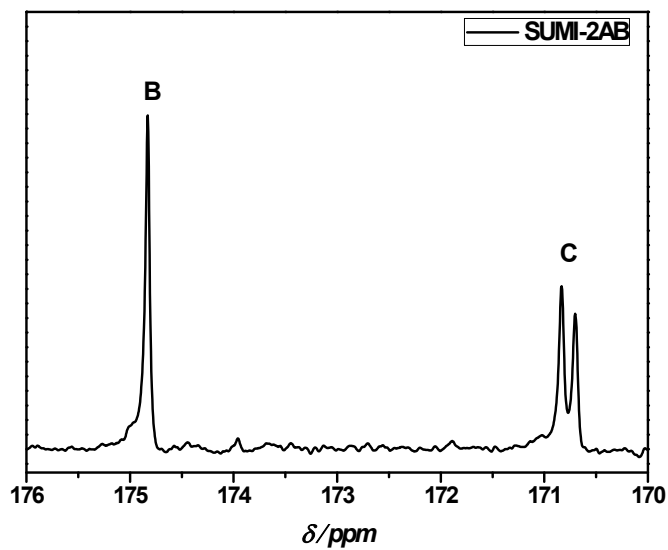

**Figure S5.** Zoom into <sup>13</sup>C NMR spectrum of **SUMI-2AB** (*n*BA-EHA oligo-RAFT agent), the two peaks (C) can be assigned to different diastereomers.

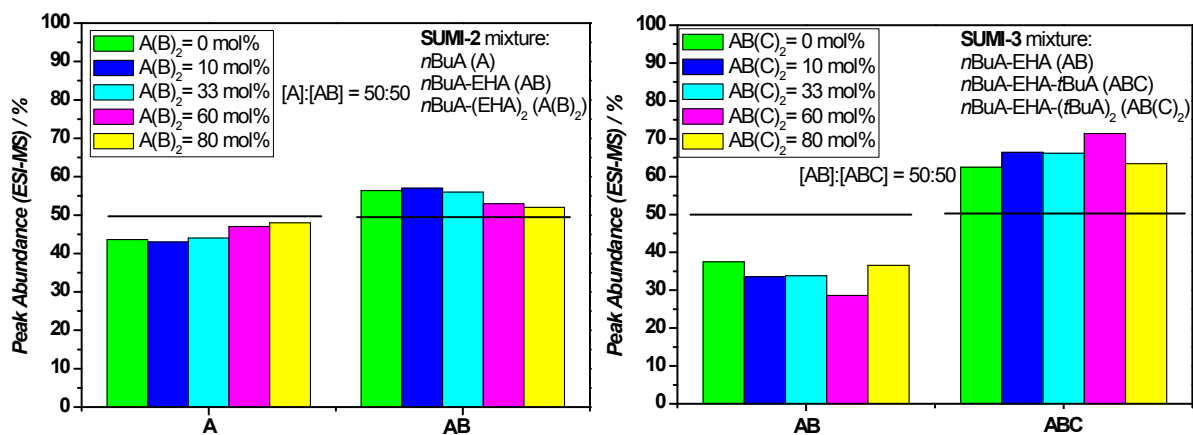

**Figure S6.** Left: ESI-MS peak abundance of A and AB for a constant A:AB molar ratio in the SUMI-2 calibration mixture while the moles of A(B)<sub>2</sub> are varied. Right: ESI-MS peak abundance of AB and ABC for a constant AB:ABC molar ratio in the SUMI-3 calibration mixture while mol% AB(C)<sub>2</sub> is varied.

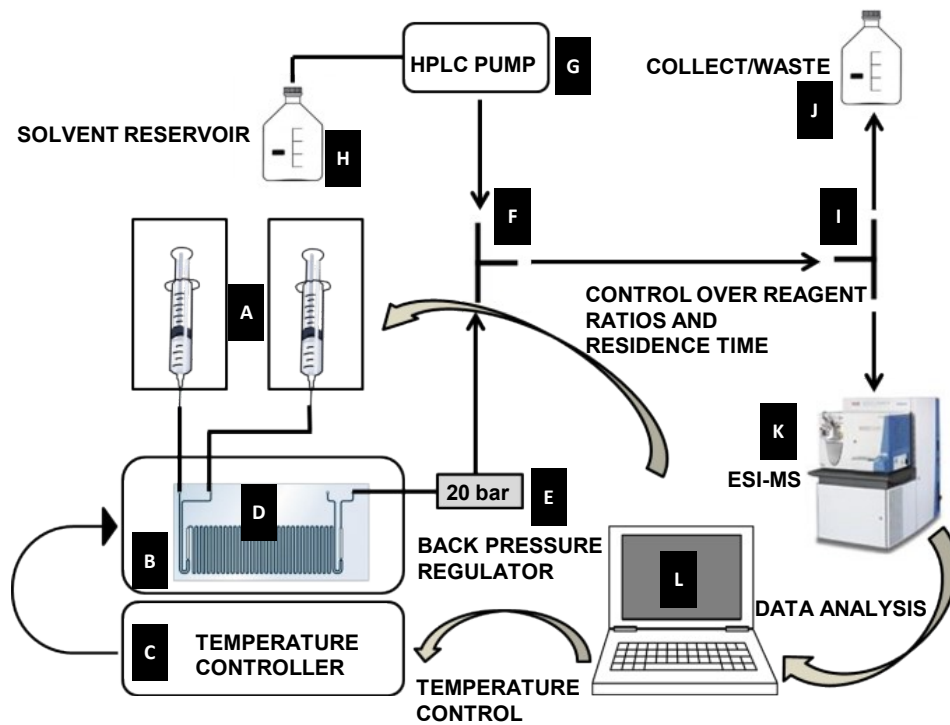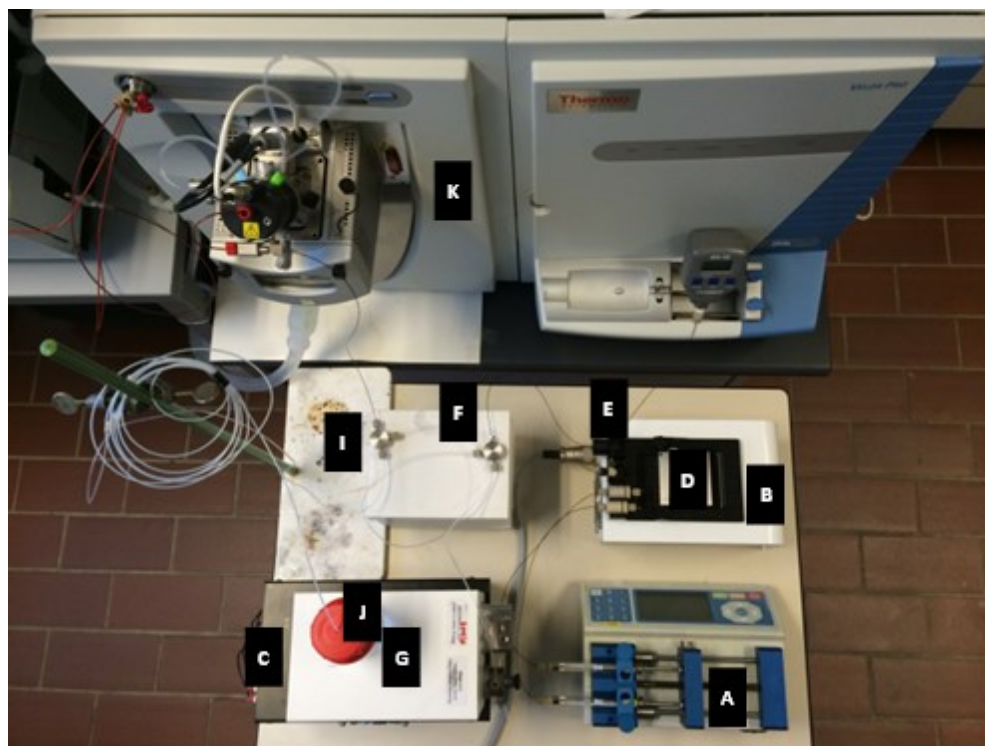

**Figure S7.** Representation of a flow chart of the on-line setup (top) and image of the on-line setup (bottom).

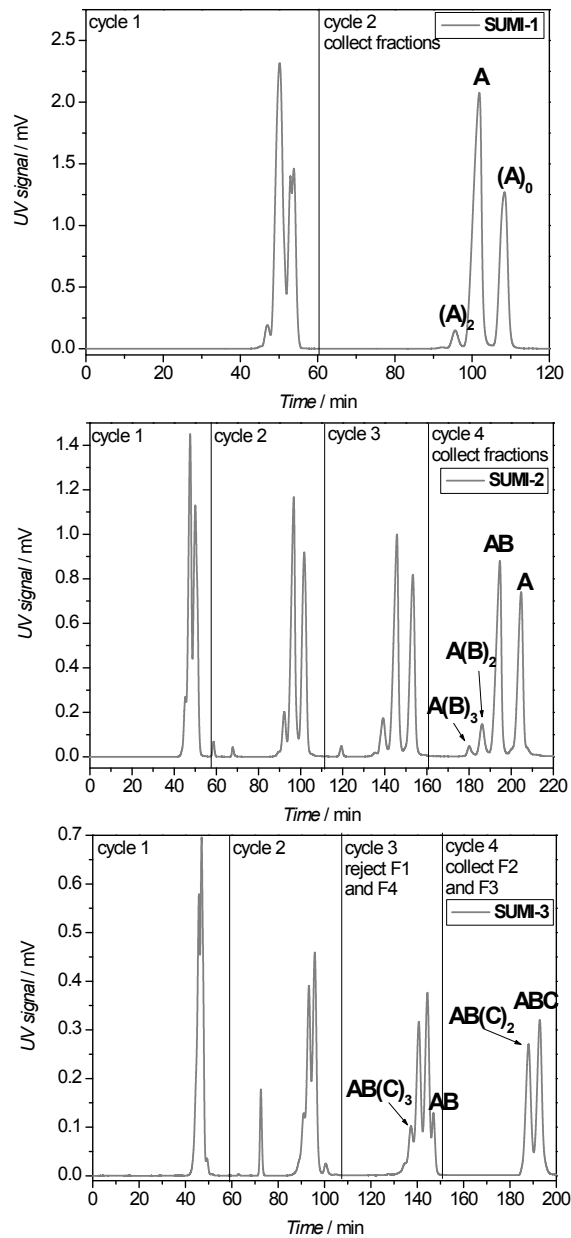

**Figure S8.** Recycling SEC trace recorded during consecutive purification cycles of **SUMI-1**, **SUMI-2** and **SUMI-3**. (data partially previously published in [2])

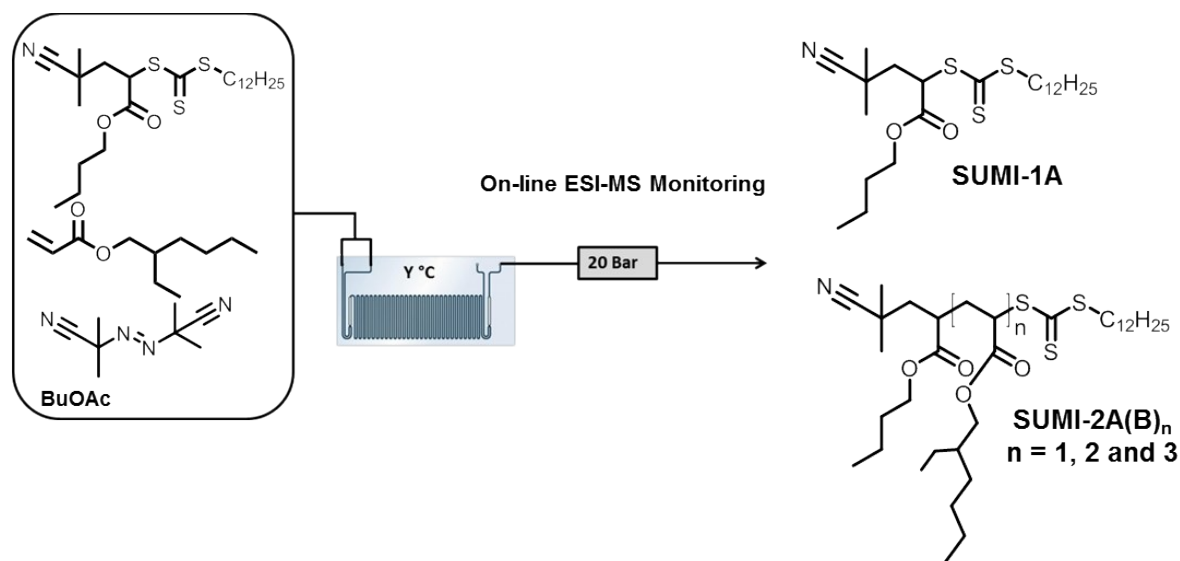

**Scheme S1.** Schematic representation of the reaction products for the microreactor synthesis of **SUMI-2**. (previously published in [1])

**Table S1.** Microreactor screening conditions and ESI-MS peak abundances for the synthesis of **SUMI-2AB**. (previously published in [1])

| Condition | Temp. (°C) | [EHA] : [SUMI-1A] | Residence Time (min) | A (%)    | AB (%)    | A(B) <sub>2</sub> (%) | A(B) <sub>3</sub> (%) |
|-----------|------------|-------------------|----------------------|----------|-----------|-----------------------|-----------------------|
| 1         | 95         | 5:1               | 10                   | 50       | 38        | 10                    | 2                     |
| 2         | 95         | 10:1              | 5                    | 41       | 50        | 9                     | 0                     |
| 3         | 95         | 10:1              | 7,5                  | 11       | 58        | 27                    | 4                     |
| 4         | 100        | 1:1               | 5                    | 70       | 30        | 0                     | 0                     |
| 5         | 100        | 2:1               | 5                    | 47       | 49        | 4                     | 0                     |
| 6         | 100        | 2:1               | 10                   | 22       | 62        | 16                    | 0                     |
| 7         | 100        | 3:1               | 8                    | 9        | 61        | 27                    | 3                     |
| 8         | 100        | 4:1               | 6                    | 12       | 60        | 25                    | 3                     |
| 9         | 100        | 5:1               | 2,5                  | 40       | 54        | 6                     | 0                     |
| 10        | 100        | 5:1               | 4                    | 16       | 62        | 20                    | 2                     |
| <b>11</b> | <b>100</b> | <b>5:1</b>        | <b>5</b>             | <b>9</b> | <b>61</b> | <b>26</b>             | <b>4</b>              |
| 12        | 110        | 3:1               | 2,5                  | 19       | 65        | 16                    | 0                     |
| 13        | 110        | 3:1               | 4                    | 9        | 68        | 19                    | 4                     |
| 14        | 110        | 2:1               | 4                    | 28       | 61        | 11                    | 0                     |
| 15        | 110        | 2:1               | 5                    | 20       | 64        | 16                    | 0                     |



**Table S2.** Microreactor screening conditions and molar ratios of all insertion products for the synthesis of **SUMI-2AB**.\* (primary experimental results previously published in [1])

| Condition | Temp. (°C) | [EHA] : [SUMI-1A] | Residence Time (min) | A (%)     | AB (%)    | A(B) <sub>2</sub> (%) | A(B) <sub>3</sub> (%) |
|-----------|------------|-------------------|----------------------|-----------|-----------|-----------------------|-----------------------|
| 1         | 95         | 5:1               | 10                   | 57        | 31        | 10                    | 2                     |
| 2         | 95         | 10:1              | 5                    | 48        | 43        | 9                     | 0                     |
| 3         | 95         | 10:1              | 7,5                  | 13        | 56        | 27                    | 4                     |
| 4         | 100        | 1:1               | 5                    | 78        | 22        | 0                     | 0                     |
| 5         | 100        | 2:1               | 5                    | 56        | 40        | 4                     | 0                     |
| 6         | 100        | 2:1               | 10                   | 27        | 57        | 16                    | 0                     |
| 7         | 100        | 3:1               | 8                    | 11        | 59        | 27                    | 3                     |
| 8         | 100        | 4:1               | 6                    | 13        | 59        | 25                    | 3                     |
| 9         | 100        | 5:1               | 2,5                  | 48        | 46        | 6                     | 0                     |
| 10        | 100        | 5:1               | 4                    | 20        | 58        | 20                    | 2                     |
| <b>11</b> | <b>100</b> | <b>5:1</b>        | <b>5</b>             | <b>11</b> | <b>59</b> | <b>26</b>             | <b>4</b>              |
| 12        | 110        | 3:1               | 2,5                  | 24        | 60        | 16                    | 0                     |
| 13        | 110        | 3:1               | 4                    | 11        | 66        | 19                    | 4                     |
| 14        | 110        | 2:1               | 4                    | 35        | 54        | 11                    | 0                     |
| 15        | 110        | 2:1               | 5                    | 24        | 60        | 16                    | 0                     |

\* It is assumed that peak abundances of A(B)<sub>2</sub> and A(B)<sub>3</sub> match the true molar ratio.

**Table S3.** Theoretical and isolated yields for **SUMI2** and **SUMI3** products, synthesized with different setups. (part of experimental results already previously published in [1] and [2])

| Setup     | Desired SUMI | Theoretical Yield (%) | Isolated Yield (%) |
|-----------|--------------|-----------------------|--------------------|
| Batch     | SUMI-2AB     | 50                    | 46                 |
| Batch     | SUMI-3ABC    | 30                    | 20                 |
| Batch     | SUMI-2AC     | n.a.                  | 50                 |
| Batch     | SUMI-3ACB    | n.a.                  | 20                 |
| Microflow | SUMI-2AB     | 59                    | 43                 |
| Microflow | SUMI-3ABC    | 34                    | n.a.               |
| Mesoflow  | SUMI-2AB     | 53                    | 48                 |
| Mesoflow  | SUMI-3ABC    | 22                    | 20                 |

## Overview Predici model

***Coefficients (CL-independent model)***

|             |                                                                                 |
|-------------|---------------------------------------------------------------------------------|
| $k_t$       | $1 \cdot 10^9 \text{ L} \cdot \text{mol}^{-1} \cdot \text{s}^{-1}$              |
| $k_d$       | $A = 1.580 \text{e}+15 \text{ s}^{-1}; E_A/R = 1.551 \text{e}+04 \text{ J/mol}$ |
| $k_{p1}$    | $7 \cdot 10^4 \text{ L} \cdot \text{mol}^{-1} \cdot \text{s}^{-1}$              |
| $k_{p2}$    | $7 \cdot 10^4 \text{ L} \cdot \text{mol}^{-1} \cdot \text{s}^{-1}$              |
| $k_{p3}$    | $7 \cdot 10^4 \text{ L} \cdot \text{mol}^{-1} \cdot \text{s}^{-1}$              |
| $k_{ad1}$   | $7 \cdot 10^6 \text{ L} \cdot \text{mol}^{-1} \cdot \text{s}^{-1}$              |
| $k_{ad2}$   | $7 \cdot 10^6 \text{ L} \cdot \text{mol}^{-1} \cdot \text{s}^{-1}$              |
| $k_{ad3}$   | $7 \cdot 10^6 \text{ L} \cdot \text{mol}^{-1} \cdot \text{s}^{-1}$              |
| $k_{ad4}$   | $7 \cdot 10^6 \text{ L} \cdot \text{mol}^{-1} \cdot \text{s}^{-1}$              |
| $k_{frag1}$ | $7 \cdot 10^3 \text{ s}^{-1}$                                                   |
| $k_{frag2}$ | $7 \cdot 10^3 \text{ s}^{-1}$                                                   |
| $k_{frag3}$ | $7 \cdot 10^3 \text{ s}^{-1}$                                                   |
| $k_{frag4}$ | $7 \cdot 10^3 \text{ s}^{-1}$                                                   |
| $k_{p1ini}$ | $7 \cdot 10^4 \text{ L} \cdot \text{mol}^{-1} \cdot \text{s}^{-1}$              |
| $k_{p2ini}$ | $7 \cdot 10^4 \text{ L} \cdot \text{mol}^{-1} \cdot \text{s}^{-1}$              |
| $k_{p3ini}$ | $7 \cdot 10^4 \text{ L} \cdot \text{mol}^{-1} \cdot \text{s}^{-1}$              |

***Reaction Modules***

**Initiator decomposition**

AIBN  $\rightarrow$  I + I ,  $k_d$

**Propagation**

I + monomer  $\rightarrow$  IM ,  $k_{ini}$

IM + monomer  $\rightarrow$  IMM ,  $k_{p1ini}$

IMM + monomer  $\rightarrow$  IMMM ,  $k_{p2ini}$

IMMM + monomer  $\rightarrow$  IMMMM , kp3ini

RM + monomer  $\rightarrow$  RMM , kp1

RMM + monomer  $\rightarrow$  RMMM , kp2

RMMM + monomer  $\rightarrow$  RMMMM , kp3

### **SUMI-RAFT equilibria**

I + RMTTC  $\rightarrow$  INT(ISMR) , kad1

IM + RMTTC  $\rightarrow$  INT(ISMR) , kad1

IMM + RMTTC  $\rightarrow$  INT(ISMR) , kad2

IMMM + RMTTC  $\rightarrow$  INT(ISMR) , kad3

IMMMM + RMTTC  $\rightarrow$  INT(ISMR) , kad4

I + RMMTTC  $\rightarrow$  INT(ISMMR) , kad2

IM + RMMTTC  $\rightarrow$  INT(ISMMR) , kad2

IMM + RMMTTC  $\rightarrow$  INT(ISMMR) , kad2

IMMM + RMMTTC  $\rightarrow$  INT(ISMMR) , kad3

IMMMM + RMMTTC  $\rightarrow$  INT(ISMMR) , kad4

I + RMMMTTC  $\rightarrow$  INT(ISMMMR) , kad3

IM + RMMMTTC  $\rightarrow$  INT(ISMMMR) , kad3

IMM + RMMMTTC  $\rightarrow$  INT(ISMMMR) , kad3

IMMM + RMMMTTC  $\rightarrow$  INT(ISMMMR) , kad3

IMMMM + RMMMTTC  $\rightarrow$  INT(ISMMMR) , kad4

I + RMMMMTTC  $\rightarrow$  INT(ISMMMMR) , kad4

IM + RMMMMTTC  $\rightarrow$  INT(ISMMMMR) , kad4

IMM + RMMMMTTC  $\rightarrow$  INT(ISMMMMR) , kad4

IMMM + RMMMMTTC  $\rightarrow$  INT(ISMMMMR) , kad4

IMMMM + RMMMMTTC  $\rightarrow$  INT(ISMMMMR) , kad4

INT(ISMR)  $\rightarrow$  RM + Dead , kfrag1

INT(ISMR)  $\rightarrow$  RMTTC + Dead , kfrag1

INT(ISMMR) ---> RMM + Dead , kfrag2  
 INT(ISMMR) ---> RMMTTC + Dead , kfrag2  
 INT(ISMMM) ---> RMMM + Dead , kfrag3  
 INT(ISMMM) ---> RMMMTTC + Dead , kfrag3  
 INT(ISMMMM) ---> RMMMM + Dead , kfrag4  
 INT(ISMMMM) ---> RMMMMTTC + Dead , kfrag4  
 RM + RMTTC ---> INT(RMSMR) , kad1  
 RMM + RMTTC ---> INT(RMMSMR) , kad2  
 RMMM + RMTTC ---> INT(RMMMSMR) , kad3  
 RMMMM + RMTTC ---> INT(RMMMMSMR) , kad4  
 INT(RMSMR) ---> RM + RMTTC , kfrag1  
 INT(RMMSMR) ---> RMM + RMTTC , kfrag2  
 INT(RMMMSMR) ---> RMMM + RMTTC , kfrag3  
 INT(RMMMMSMR) ---> RMMMM + RMTTC , kfrag4  
 INT(RMSMR) ---> RMTTC + RM , kfrag1  
 INT(RMMSMR) ---> RMMTTC + RM , kfrag1  
 INT(RMMMSMR) ---> RMMMTTC + RM , kfrag1  
 INT(RMMMMSMR) ---> RMMMMTTC + RM , kfrag1  
 RM + RMMTTC ---> INT(RMSMMR) , kad2  
 RMM + RMMTTC ---> INT(RMMSMMR) , kad2  
 RMMM + RMMTTC ---> INT(RMMMSMMR) , kad3  
 RMMMM + RMMTTC ---> INT(RMMMMSMMR) , kad4  
 INT(RSMMR) ---> RMMTTC + RM , kfrag1  
 INT(RMMSMMR) ---> RMMTTC + RMM , kfrag2  
 INT(RMMSMMR) ---> RMM + RMMTTC , kfrag2  
 INT(RMMMSMMR) ---> RMMTTC + RMMM , kfrag3  
 INT(RMMMMSMMR) ---> RMMTTC + RMMMM , kfrag4

INT(RMSMMR) ---> RMTTC + RMM , kfrag2  
 INT(RMMMSMMR) ---> RMMM TTC + RMM , kfrag2  
 INT(RMMMMMSMMR) ---> RMMMM TTC + RMM , kfrag2  
 RM + RMMM TTC ---> INT(RMSMMMMR) , kad3  
 RMM + RMMM TTC ---> INT(RMMSMMMMR) , kad3  
 RMMM + RMMM TTC ---> INT(RMMMSMMMMR) , kad3  
 RMMMM + RMMM TTC ---> INT(RMMMMMSMMMMR) , kad4  
 INT(RSMMMMR) ---> RMMM TTC + RM , kfrag1  
 INT(RSMMMMR) ---> RMTTC + RMMM , kfrag3  
 INT(RMMSMMMMR) ---> RMMM TTC + RMM , kfrag2  
 INT(RMMSMMMMR) ---> RMM TTC + RMMM , kfrag3  
 INT(RMMMSMMMMR) ---> RMMM TTC + RMMM , kfrag3  
 INT(RMMMSMMMMR) ---> RMMM + RMMM TTC , kfrag3  
 INT(RMMMMMSMMMMR) ---> RMMM TTC + RMMMM , kfrag4  
 INT(RMMMMMSMMMMR) ---> RMMMM TTC + RMMM , kfrag3  
 RM + RMMMM TTC ---> INT(RSMMMMMR) , kad4  
 RMM + RMMMM TTC ---> INT(RMMSMMMMMR) , kad4  
 RMMM + RMMMM TTC ---> INT(RMMMSMMMMMR) , kad4  
 RMMMM + RMMMM TTC ---> INT(RMMMMMSMMMMMR) , kad4  
 INT(RSMMMMMR) ---> RMMMM TTC + RM , kfrag1  
 INT(RSMMMMMR) ---> RMTTC + RMMMM , kfrag4  
 INT(RMMSMMMMMR) ---> RMMMM TTC + RMM , kfrag2  
 INT(RMMSMMMMMR) ---> RMM TTC + RMMMM , kfrag4  
 INT(RMMMSMMMMMR) ---> RMMM TTC + RMMMM , kfrag4  
 INT(RMMMSMMMMMR) ---> RMMMM TTC + RMMM , kfrag3  
 INT(RMMMMMSMMMMMR) ---> RMMMM TTC + RMMMM , kfrag4  
 INT(RMMMMMSMMMMMR) ---> RMMMM + RMMMM TTC , kfrag4

## Termination

$I + I \rightarrow \text{Dead}, kt$

$I + RM \rightarrow \text{Dead}, kt$

$I + RMM \rightarrow \text{Dead}, kt$

$I + RMMM \rightarrow \text{Dead}, kt$

$I + RMMMM \rightarrow \text{Dead}, kt$

$IM + RM \rightarrow \text{Dead}, kt$

$IM + RMM \rightarrow \text{Dead}, kt$

$IM + RMMM \rightarrow \text{Dead}, kt$

$IM + RMMMM \rightarrow \text{Dead}, kt$

$IMM + RM \rightarrow \text{Dead}, kt$

$IMM + RMM \rightarrow \text{Dead}, kt$

$IMM + RMMM \rightarrow \text{Dead}, kt$

$IMM + RMMMM \rightarrow \text{Dead}, kt$

$IMMM + RM \rightarrow \text{Dead}, kt$

$IMMM + RMM \rightarrow \text{Dead}, kt$

$IMMM + RMMM \rightarrow \text{Dead}, kt$

$IMMM + RMMMM \rightarrow \text{Dead}, kt$

$IMMMM + RM \rightarrow \text{Dead}, kt$

$IMMMM + RMM \rightarrow \text{Dead}, kt$

$IMMMM + RMMM \rightarrow \text{Dead}, kt$

$IMMMM + RMMMM \rightarrow \text{Dead}, kt$

$RM + RM \rightarrow \text{Dead}, kt$

$RM + RMM \rightarrow \text{Dead}, kt$

$RM + RMMM \rightarrow \text{Dead}, kt$

$RM + RMMMM \rightarrow \text{Dead}, kt$

$RMM + RMM \rightarrow \text{Dead}, kt$

$RMM + RMMM \rightarrow \text{Dead}, kt$

$RMM + RMMMM \rightarrow \text{Dead}, kt$

$RMMM + RMMM \rightarrow \text{Dead}, kt$

$RMMM + RMMMM \rightarrow \text{Dead}, kt$

$RMMMM + RMMMM \rightarrow \text{Dead}, kt$

No efficiency factors have been used and all reactions are considered explicitly.

## References

- [1] J. Haven, J. Vandenberg and T. Junkers, *Chem. Commun.*, 2015, 51, 4611–4614.
- [2] J. Vandenberg, G. Reekmans, P. Adriaensens and T. Junkers, *Chem. Commun.*, 2013, **49**, 10358–10360.
